# Supplementary material
Source: PubMed Central journal article supplement (PMC1769009)
Supplement: heart_91_7_899__1.pdf [file heart_91_7_899__1.pdf]

**Table 1: Included studies – baseline data on trial participants and trial quality**

| Author & Year                        | Setting     | Total number | Participants     |        |                        | Follow-up (weeks) | Quality criteria achieved <sup>1</sup><br>(Max = 8) | Notes regarding design/quality                                                                                                                                                                       |
|--------------------------------------|-------------|--------------|------------------|--------|------------------------|-------------------|-----------------------------------------------------|------------------------------------------------------------------------------------------------------------------------------------------------------------------------------------------------------|
|                                      |             |              | Mean age (years) | % Male | Mean ejection fraction |                   |                                                     |                                                                                                                                                                                                      |
| Blue 2001 <sup>23</sup>              | UK          | 165          | 75.0             | 58%    | -                      | 52                | 8                                                   |                                                                                                                                                                                                      |
| Bouvy 2003 <sup>33</sup>             | Netherlands | 152          | 69.7             | 66%    | -                      | 26                | 8                                                   |                                                                                                                                                                                                      |
| Capomolla 2002 <sup>31</sup>         | Italy       | 234          | 56.0             | 84%    | 30.0%                  | 52                | 4                                                   | No details of allocation concealment, outcome data from single source only, no clear primary outcome, no clear inclusion/exclusion criteria.                                                         |
| Cline 1998 <sup>34</sup>             | Sweden      | 190          | 75.6             | 53%    | 34.0%                  | 52                | 5                                                   | No details of allocation concealment, no clear primary outcome, ITT not specified. NB: Randomised consent procedure used. 16 intervention patients refused consent vs. 0 controls.                   |
| Cleland / Coletta 2002 <sup>13</sup> | Europe      | 426          | -                | -      | -                      | 57                | 3                                                   | Abstract only available. No details of allocation concealment, ITT not specified, outcome data not clearly cross-checked, baseline comparability unclear, inclusion/exclusion criteria not specified |
| de Lusignan 2001 <sup>22</sup>       | UK          | 20           | -                | -      | -                      | 52                | 3                                                   | No details of allocation concealment, outcome data from single source only, no clear primary outcome, ITT not specified, no data on baseline comparability.                                          |
| Doughty 2002 <sup>24</sup>           | New Zealand | 197          | 73.0             | 60%    | 32.2%                  | 52                | 8                                                   | Cluster RCT, small cluster size (mean = 1.5 patients/cluster), authors adjusted for effect of clustering and found no effect on results                                                              |
| Ekman 1998 <sup>17</sup>             | Sweden      | 158          | 80.3             | 58%    | 40.5%                  | 26                | 6                                                   | Outcome data from single source only, no clear primary outcome                                                                                                                                       |
| Gattis 1999 <sup>20</sup>            | USA         | 181          | 67.2             | 68%    | 30%                    | 24                | 6                                                   | No details of allocation concealment, ITT not specified                                                                                                                                              |
| Goldberg 2003 <sup>35</sup>          | USA         | 280          | 59.1             | 68%    | 22%                    | 26                | 8                                                   |                                                                                                                                                                                                      |
| Goodyer 1995 <sup>12</sup>           | UK          | 100          | 84.5             | 27%    | -                      | 13                | 2                                                   | Criteria for CHF diagnosis not specified, no details of allocation concealment, outcome data from single source only, no clear primary outcome, ITT not specified, follow-up < 6 months.             |

**Table 1: Included studies – baseline data on trial participants and trial quality (cont)**

| Author & Year                | Setting     | Total number | Participants     |        |                        | Follow-up (weeks) | Quality criteria achieved <sup>1</sup><br>(Max = 8) | Notes regarding design/quality                                                                                                                                                                           |
|------------------------------|-------------|--------------|------------------|--------|------------------------|-------------------|-----------------------------------------------------|----------------------------------------------------------------------------------------------------------------------------------------------------------------------------------------------------------|
|                              |             |              | Mean age (years) | % male | Mean ejection fraction |                   |                                                     |                                                                                                                                                                                                          |
| Grancelli 2003 <sup>21</sup> | Argentina   | 1518         | 65               | 71%    | -                      | 52 (mean)         | 7                                                   | Unclear how outcome data were gathered.                                                                                                                                                                  |
| Holland 2004 <sup>11</sup>   | UK          | 71           | 85.9             | 48%    | -                      | 26                | 6                                                   | Criteria for CHF solely determined by discharge diagnosis                                                                                                                                                |
| Jaarsma 1999 <sup>15</sup>   | Netherlands | 179          | 73.0             | 58%    | 34.4%                  | 39                | 7                                                   | ITT not specified. NB: 7 subjects excluded post-randomisation.                                                                                                                                           |
| Kasper 2002 <sup>25</sup>    | USA         | 200          | 61.9             | 61%    | 27.3%                  | 26                | 7                                                   | Criteria for diagnosis of CHF not specified                                                                                                                                                              |
| Krumholz 2002 <sup>18</sup>  | USA         | 88           | 73.8             | 57%    | 37.5%                  | 52                | 6                                                   | No details of concealed allocation, groups appeared to differ at baseline                                                                                                                                |
| Laramee 2003 <sup>36</sup>   | USA         | 287          | 70.7             | 54%    | -                      | 13                | 5                                                   | No mention of intention to treat, follow-up < 6 months, no details of concealed allocation                                                                                                               |
| McDonald 2002 <sup>37</sup>  | Ireland     | 98           | 69.0             | 66%    | 37.0%                  | 12                | 5                                                   | No details of concealed allocation, outcome data from single source only, follow-up < 6 months                                                                                                           |
| Naylor 2004 <sup>26</sup>    | USA         | 239          | 76.0             | 43%    | -                      | 52                | 7                                                   | Validation of diagnosis of heart failure not specified                                                                                                                                                   |
| Philbin 2000 <sup>29</sup>   | USA         | 1504         | 75.7             | 44%    | 39.6%                  | 26                | 3                                                   | No concealed allocation, no clear data cross-checking, poor baseline comparability, inclusion/exclusion criteria not specified and diagnostic criteria for heart failure unclear.                        |
| Rainville 1999 <sup>14</sup> | USA         | 34           | 70.0             | 50%    | -                      | 52                | 5                                                   | Outcome data from single source only, ITT not specified, groups appeared to differ at baseline. NB: 4 subjects excluded post-randomisation.                                                              |
| Rich 1993 <sup>19</sup>      | USA         | 98           | 79.3             | 41%    | -                      | 13                | 3                                                   | No details of concealed allocation, groups appeared to differ at baseline, outcome data from single source only, follow-up < 6m, ITT not specified. NB: subjects randomised 2:1 intervention vs. control |
| Rich 1995 <sup>16</sup>      | USA         | 282          | 78.6             | 37%    | 42.5%                  | 13                | 5                                                   | Groups appeared to differ at baseline, outcome data from single source only, follow-up < 6 months                                                                                                        |

**Table 1: Included studies – baseline data on trial participants and trial quality (cont)**

| Author & Year                 | Setting   | Total number | Participants     |        |                        | Follow-up (weeks) | Quality criteria achieved <sup>1</sup><br>(Max = 8) | Notes regarding design/quality                                                                                                                                                                                                                                                                                    |
|-------------------------------|-----------|--------------|------------------|--------|------------------------|-------------------|-----------------------------------------------------|-------------------------------------------------------------------------------------------------------------------------------------------------------------------------------------------------------------------------------------------------------------------------------------------------------------------|
|                               |           |              | Mean age (years) | % male | Mean ejection fraction |                   |                                                     |                                                                                                                                                                                                                                                                                                                   |
| Riegel 2002 <sup>8</sup>      | USA       | 358          | 73.9             | 49%    | 42.7%                  | 26                | 5                                                   | Criteria for diagnosis of CHF not specified, no details of concealed allocation, not analysed by ITT. NB: cluster RCT. No adjustment for clustering but cluster size small (mean = 1.3 patients/cluster). 57 subjects excluded post-randomisation as physician refused intervention (29) or patient withdrew (28) |
| Serxner 1998 <sup>28</sup>    | USA       | 109          | 71.0             | 48%    | -                      | 26                | 2                                                   | Criteria for diagnosis of CHF not specified, no details of concealed allocation, no data on baseline comparability, no clear primary outcome, outcome data from single source only, ITT not specified.                                                                                                            |
| Stewart 1998 <sup>32</sup>    | Australia | 97           | 75.0             | 48%    | 38.5%                  | 26                | 7                                                   | Outcome data from single source only. NB: part of larger study of elderly hospital discharges (total n=762).                                                                                                                                                                                                      |
| Stewart 1999 <sup>38</sup>    | Australia | 200          | 75.7             | 62%    | 37.0%                  | 26                | 7                                                   | Outcome data from single source only                                                                                                                                                                                                                                                                              |
| Stromberg 2003 <sup>39</sup>  | Sweden    | 106          | 77.5             | 61%    | -                      | 52                | 6                                                   | Unclear if allocation concealed beyond use of sealed envelopes, outcome data from single source only.                                                                                                                                                                                                             |
| Varma 1999 <sup>30</sup>      | UK        | 83           | 75.9             | 41%    | -                      | 52                | 3                                                   | No details of concealed allocation, groups appear to differ at baseline, no clear primary outcome, outcome data from single source only, ITT not specified.                                                                                                                                                       |
| Weinberger 1996 <sup>27</sup> | USA       | 504          | 62.8             | 99%    | -                      | 26                | 7                                                   | Criteria for diagnosis of CHF not specified. NB: this was sub-group within a large study also recruiting patients with diabetes or chronic obstructive pulmonary disease (total subjects= 1396)                                                                                                                   |

CHF, congestive heart failure; ITT, intention to treat; RCT, randomised controlled trial.

<sup>1</sup>Quality criteria used: concealed allocation; use of an intention to treat analysis; outcome data confirmed by using at least two sources; an explicit statement of inclusion or exclusion criteria; baseline comparability between groups; a clearly defined primary outcome; clear diagnostic criteria for heart failure; and length of follow-up (where 6 months and over was considered adequate).
