# Supplementary material
Source: PubMed Central journal article supplement (PMC1769009)
Supplement: heart_91_7_899__2.pdf [file heart_91_7_899__2.pdf]

**Table 2: Description of interventions provided**

| <b>Author</b>           | <b>Intervention subgroup (category)</b> | <b>Intervention – detail</b>                                                                                                                                                                                                                                                  | <b>Intervention provided by</b>                                                    | <b>Educational component</b>                                                                    | <b>Planned contacts/ month of follow-up</b> | <b>Intensity judgement</b> |
|-------------------------|-----------------------------------------|-------------------------------------------------------------------------------------------------------------------------------------------------------------------------------------------------------------------------------------------------------------------------------|------------------------------------------------------------------------------------|-------------------------------------------------------------------------------------------------|---------------------------------------------|----------------------------|
| Blue <sup>23</sup>      | A (1)                                   | Home educational and support visits of decreasing frequency, optimising drugs and monitoring electrolytes, plus phone contact as needed and liaison with other professionals                                                                                                  | Specialist nurse                                                                   | CHF knowledge and treatment advice, diet & exercise, promotion of self-management.              | 1.5                                         | high                       |
| Bouvy <sup>33</sup>     | C (3,6)                                 | Review in pharmacy and monthly phone follow-up. Intervention focused on drug use and reasons for non-compliance                                                                                                                                                               | Community pharmacist                                                               | Medication                                                                                      | 1                                           | low                        |
| Capomolla <sup>31</sup> | C (3,5)                                 | Heart failure management programme delivered in a day hospital. Tailored therapy, physical training & counselling, correction of risk factors and education. Follow-up determined by need / symptoms.                                                                         | Cardiologist, nurses, physiotherapist, dietician, psychologist & social assistant. | Monitoring weight, fluid restriction, nutrition & exercise, promotion of self-management        | Unclear                                     | high                       |
| Cline <sup>34</sup>     | A (1)                                   | 2x30 minute educational visits in hospital plus 1 hour group oral and video presentation for patients and family after discharge plus follow up at easy access nurse clinic. Medication organiser offered. Nurse available by phone. One scheduled visit by nurse at 8 months | Study nurse                                                                        | CHF knowledge, treatment adherence, promotion of self-management & use of patient symptom diary | 0.5                                         | low                        |

**Table 2: Description of interventions provided (cont)**

| <b>Author</b>                   | <b>Intervention sub-group (category)</b> | <b>Intervention – detail</b>                                                                                                                        | <b>Intervention provided by</b>              | <b>Educational component</b>                                    | <b>Planned contacts/ month of follow-up</b> | <b>Intensity judgement</b> |
|---------------------------------|------------------------------------------|-----------------------------------------------------------------------------------------------------------------------------------------------------|----------------------------------------------|-----------------------------------------------------------------|---------------------------------------------|----------------------------|
| Cleland / Coletta <sup>13</sup> | B (2,3)                                  | Home tele-monitoring (weight, BP, ECG recorded twice daily) or monthly phone-calls from a nurse                                                     | Cardiologist, specialist nurse               | Unclear                                                         | unclear for tele-monitored group            | high                       |
| de Lusignan <sup>22</sup>       | B (2)                                    | Remote monitoring and tele-consultation with clinicians via videophone in patients' homes. Weekly consult for 3-months then decreasing frequency    | Study nurse & GPs, cardiologist physiologist | Unclear                                                         | 2                                           | high                       |
| Doughty <sup>24</sup>           | D (5, 6)                                 | 4 individual and group outpatient education sessions plus liaison with, and 6 weekly follow up by, GPs & heart failure clinic.                      | Study nurse, cardiologist, GPs               | Medication, exercise, diet, monitoring weight & self-management | 1                                           | high                       |
| Ekman <sup>17</sup>             | C (3,5)                                  | Nurse-monitored outpatient clinic or monthly phone contact by nurse. Written information to patients & regular liaison with primary care providers. | Clinic nurse                                 | Medication, diet & promotion of self-management & weighing      | 1                                           | high                       |

**Table 2: Description of interventions provided (cont)**

| <b>Author</b>           | <b>Intervention sub-group (category)</b> | <b>Intervention – detail</b>                                                                                                              | <b>Intervention provided by</b> | <b>Educational component</b>                                                                                   | <b>Planned contacts/ month of follow-up</b> | <b>Intensity judgement</b> |
|-------------------------|------------------------------------------|-------------------------------------------------------------------------------------------------------------------------------------------|---------------------------------|----------------------------------------------------------------------------------------------------------------|---------------------------------------------|----------------------------|
| Gattis <sup>20</sup>    | C (3,5)                                  | Educational session by pharmacist who also optimised therapy & liaised with physicians & provided phone follow-up at 2, 12 & 24 weeks.    | Clinical pharmacist             | Medication changes discussed and medication education                                                          | 0.66                                        | low                        |
| Goldberg <sup>35</sup>  | B (2,3)                                  | Home tele-monitoring (weight and symptom checking daily)                                                                                  | Specialist nurse                | CHF knowledge, daily weight, dietary & fluid restriction, symptom self-management - to both groups in hospital | daily                                       | high                       |
| Goodyer <sup>12</sup>   | A (1)                                    | Three home visits focusing on medication. Provision of medication calendars & information leaflets.                                       | Pharmacist                      | Counselling on correct use of medication                                                                       | 1                                           | low                        |
| Grancelli <sup>21</sup> | C (3)                                    | Telephone intervention with 5 objectives: diet and drug therapy compliance, symptom monitoring, control of oedema/weight, daily exercise. | Specialist nurse                | CHF knowledge, diet & drug compliance, self-control techniques, help seeking if symptoms worsen                | >1                                          | high                       |
| Holland <sup>11</sup>   | A (1)                                    | Home visit by pharmacist to perform medication review and educate to improve medication compliance.                                       | Pharmacist                      | Focused on medication                                                                                          | 0.33                                        | low                        |

**Table 2: Description of interventions provided (cont)**

| <b>Author</b>          | <b>Intervention sub-group (category)</b> | <b>Intervention – detail</b>                                                                                                                                                                                                                                              | <b>Intervention provided by</b>                   | <b>Educational component</b>                                                                                        | <b>Planned contacts/ month of follow-up</b> | <b>Intensity judgement</b> |
|------------------------|------------------------------------------|---------------------------------------------------------------------------------------------------------------------------------------------------------------------------------------------------------------------------------------------------------------------------|---------------------------------------------------|---------------------------------------------------------------------------------------------------------------------|---------------------------------------------|----------------------------|
| Jaarsma <sup>15</sup>  | A (1,3)                                  | Educational programme for patient (& family) during hospital stay followed by phone call from nurse one week after discharge & one home visit to reinforce/continue education.                                                                                            | Study nurse                                       | Education & promotion of self-management, sodium restriction, fluid balance & compliance                            | 0.33                                        | low                        |
| Kasper <sup>25</sup>   | A (1,3)                                  | Treatment plan devised by cardiologist. Regular phone calls (initially weekly then decreasing frequency) & monthly follow-up at clinic or home by nurse to implement plan & titrate medications as required. A pill sorter & written educational materials were provided. | Specialist nurse, cardiologist, primary physician | List of medications, 2g sodium-restricted diet & exercise advice.                                                   | 3                                           | high                       |
| Krumholz <sup>18</sup> | A (1,3)                                  | One hour educational session at home or clinic followed by regular telephone calls (initially weekly then decreasing frequency) from nurse to support/monitor patients.                                                                                                   | Specialist nurse                                  | CHF knowledge, medication, health behaviour & symptom awareness.                                                    | 1.5                                         | high                       |
| Laramee <sup>36</sup>  | C (3,5)                                  | Early discharge planning and co-ordination of care, individualised patient/family education, enhanced telephone surveillance/follow-up, and promotion of optimal CHF medication and dosages.                                                                              | Specialist nurse                                  | CHF knowledge, diet & fluid advice, risk factor modification, exercise, symptom monitoring, prognosis & counselling | 3.33                                        | high                       |

**Table 2: Description of interventions provided (cont)**

| <b>Author</b>           | <b>Intervention sub-group (category)</b> | <b>Intervention – detail</b>                                                                                                                                                                                                                             | <b>Intervention provided by</b>   | <b>Educational component</b>                                             | <b>Planned contacts/ month of follow-up</b> | <b>Intensity judgement</b> |
|-------------------------|------------------------------------------|----------------------------------------------------------------------------------------------------------------------------------------------------------------------------------------------------------------------------------------------------------|-----------------------------------|--------------------------------------------------------------------------|---------------------------------------------|----------------------------|
| McDonald <sup>37</sup>  | C (3,5)                                  | Education from nurse and dietician during admission plus follow up phone calls from nurse on discharge (weekly for 3 months) plus two extra clinic visits to nurse.                                                                                      | Specialist nurse, dietician       | Medication, weight monitoring, salt restriction, dietary review          | 1.5                                         | high                       |
| Naylor <sup>26</sup>    | A (1)                                    | Daily in-hospital visits to help optimise care, eight or more home visits over 3-months, plus telephone availability. Multiple home visits included assessment, treatment adjustment (in collaboration with physician) and patient/care-giver education. | Specialist nurse                  | Unclear but appeared wide-ranging                                        | 0.66                                        | high                       |
| Philbin <sup>29</sup>   | D (5)                                    | Broad quality improvement intervention with standardised admission orders, health professional education, written information for patients and a home care pathway.                                                                                      | nurse, physicians, administrators | Teaching aids were given to patients – unclear what domains were covered | unclear                                     | low                        |
| Rainville <sup>14</sup> | C (3,5)                                  | Medication review pre-discharge plus education and provision of written information. Follow-up by phone at 3 and 7 days, 1, 3 & 12 months post-discharge.                                                                                                | Pharmacist & Specialist nurse     | Medication, weight monitoring & risk modification                        | 0.5                                         | low                        |

**Table 2: Description of interventions provided (cont)**

| <b>Author</b>              | <b>Intervention sub-group (category)</b> | <b>Intervention – detail</b>                                                                                                                                                                                                         | <b>Intervention provided by</b>                                           | <b>Educational component</b>                                                            | <b>Planned contacts/ month of follow-up</b> | <b>Intensity judgement</b> |
|----------------------------|------------------------------------------|--------------------------------------------------------------------------------------------------------------------------------------------------------------------------------------------------------------------------------------|---------------------------------------------------------------------------|-----------------------------------------------------------------------------------------|---------------------------------------------|----------------------------|
| Rich 1993 <sup>19</sup>    | A (1,3)                                  | Education, dietician review, medication review and early visit by social worker pre-discharge. Daily hospital visits pre-discharge then 3 home visits by home care nurse in first week then decreasing frequency plus phone contact. | Specialist nurse, dietician, cardiologist, social worker, home care nurse | CHF and its treatment with medication cards given, dietary review, plus weighing advice | >1 (precise no. unclear)                    | high                       |
| Rich 1995 <sup>16</sup>    | A (1,3)                                  | As above (Rich 1993)                                                                                                                                                                                                                 | As above                                                                  | As above                                                                                | >1                                          | high                       |
| Riegel <sup>8</sup>        | C (3,4)                                  | Regular phone calls from nurse (approx. weekly depending on need) after discharge with management guided by decision support software. Written educational material also mailed monthly.                                             | Specialist nurse                                                          | Medication adherence and dietary advice, promotion of symptom monitoring                | 2                                           | high                       |
| Serxner <sup>28</sup>      | C (4)                                    | 4 mailings of information over 12 weeks post-discharge.                                                                                                                                                                              | Unclear                                                                   | Medication, lifestyle, and risk factor advice                                           | 0.66                                        | low                        |
| Stewart 1998 <sup>32</sup> | A (1)                                    | Counselling by nurse and/or pharmacist prior to discharge followed by home visit by nurse and pharmacist and referral for additional community-based support for those deemed to be in need.                                         | Study nurse & pharmacist                                                  | Medication review and counselling                                                       | 0.33                                        | low                        |

**Table 2: Description of interventions provided (cont)**

| Author                     | Intervention sub-group (category) | Intervention – detail                                                                                                                                                                                                                | Intervention provided by                   | Educational component                                                                            | Planned contacts/ month of follow-up            | Intensity judgement |
|----------------------------|-----------------------------------|--------------------------------------------------------------------------------------------------------------------------------------------------------------------------------------------------------------------------------------|--------------------------------------------|--------------------------------------------------------------------------------------------------|-------------------------------------------------|---------------------|
| Stewart 1999 <sup>38</sup> | A (1,3)                           | Home visit by cardiac nurse 7-14 days post-discharge, with further follow up & visits as necessary & two follow up calls                                                                                                             | Specialist nurse                           | Adherence, fluid & sodium intake, exercise, psychosocial support                                 | 0.5                                             | low                 |
| Stromberg <sup>39</sup>    | C (3,5)                           | Visit to nurse-led heart failure clinic 2 weeks after discharge. During visit treatment was optimised (in consultation with cardiologist) and patient given tailored education. Telephone follow-up to provide psycho-social support | Specialist nurse                           | CHF and its treatment, diet, smoking cessation, exercise, vaccination advice, symptom monitoring | 0.1 – 0.2 visits, unclear number of phone calls | low                 |
| Varma <sup>30</sup>        | D (5)                             | Hospital-based education & provision of information by pharmacist to encourage self-monitoring plus liaison with physicians & community pharmacists. Advice repeated in clinic 3-monthly                                             | Research pharmacist                        | Medication, diet and self-management, daily weighing                                             | 0.4                                             | low                 |
| Weinberger <sup>27</sup>   | C (3,5)                           | In-patient education by nurse and visit to hospital from primary care physician. Phone call follow-up by nurse post-discharge & review of treatment plan at clinic.                                                                  | Primary care nurse, primary care physician | Provision of educational materials                                                               | 0.5                                             | low                 |

Intervention categories:

1 = One or more planned intervention visits in the patient's home by a health care professional to educate or improve their self-management (this excludes visits simply to take blood samples or carry out interventions such as wound care). [A]

2 = Home physiological monitoring or tele-visual contact with patients. [B]

3 = One or more planned telephone call or videophone call to the patient at home. [C]

4 = Educational or symptom self-management mailings to patient's home address. [C]

5 = No planned intervention home visits, instead, intervention occurring during hospital admission or during hospital clinic attendance. [D]

6 = No planned intervention home visits, instead, intervention occurring in general practice or a community clinic. [D]

Note: if intervention was categorised as 3 & 5, this was considered to be in sub-group C.
